# Supplementary material
Source: PubMed Central journal article supplement (PMC6999667)
Supplement: NIHMS952660-supplement-Supp1.pdf [file NIHMS952660-supplement-Supp1.pdf]

**Frequency and Impact of Summertime Stratospheric Intrusions over Maryland during DISCOVER-AQ (2011): New Evidence from NASA's GEOS-5 Simulations**

L. E. Ott<sup>1</sup>, B. N. Duncan<sup>1</sup>, A. M. Thompson<sup>1</sup>, G. Diskin<sup>2</sup>, Z. Fasnacht<sup>3</sup>, A. O. Langford<sup>4</sup>, M. Lin<sup>5</sup>, A. M. Molod<sup>1,6</sup>, J. E. Nielsen<sup>1,7</sup>, S. E. Pusede<sup>8</sup>, K. Wargan<sup>1,7</sup>, A. J. Weinheimer<sup>9</sup>, Y. Yoshida<sup>1,7</sup>

<sup>1</sup>NASA Goddard Space Flight Center, Greenbelt, MD USA, <sup>2</sup>NASA Langley Research Center, Hampton, VA USA, <sup>3</sup>Department of Atmospheric and Oceanic Science, University of Maryland, College Park, MD USA, <sup>4</sup>NOAA Earth System Research Laboratory Chemical Sciences Division, Boulder, CO USA, <sup>5</sup>Program in Atmospheric and Oceanic Sciences, Princeton University and NOAA Geophysical Fluid Dynamics Laboratory, Princeton, NJ, USA, <sup>6</sup>Earth System Science Interdisciplinary Center, University of Maryland, College Park, MD USA, <sup>7</sup>Science Systems and Applications, Inc., Lanham, MD USA, <sup>8</sup>Department of Environmental Sciences, University of Virginia, Charlottesville, VA, USA, <sup>9</sup>National Center for Atmospheric Research

**Contents of this file**

Figure S1

**Introduction**

This supporting information provides a version of figure 4 using the stratospheric influence tracer.

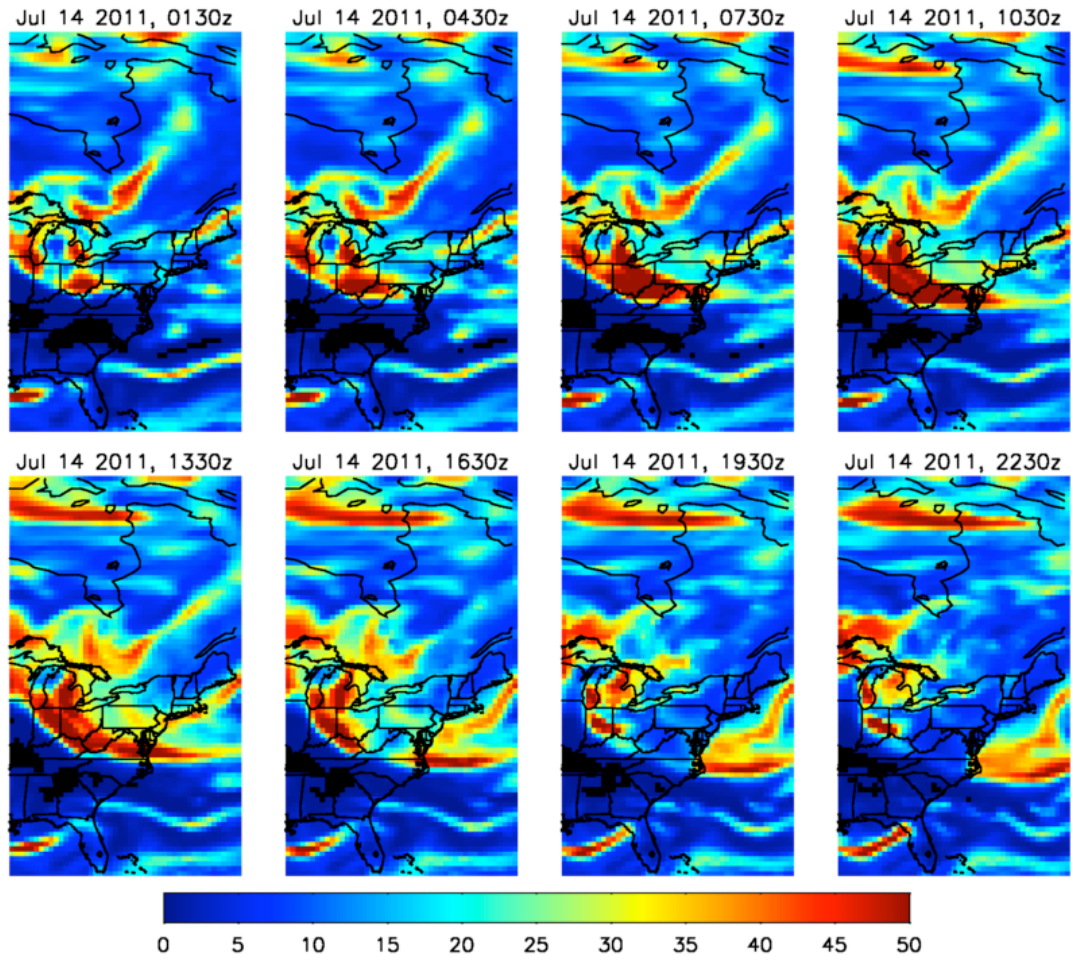

**Figure S1.** Same as figure 4, but using the influence tracer.
